# Supplementary material for: The connectome of the adult Drosophila mushroom body provides insights into function
Source: eLife. 2020 Dec 14;9:e62576. doi: 10.7554/eLife.62576 (PMC7909955; doi:10.7554/eLife.62576)
Supplement: Supplementary file 1. [file elife-62576-supp1.xlsx]

## Sheet: Sheet1
neuPrint body ID	PAM subtype as shown in Figure 28-37	neuPrint type	neuPrint instance
1233428010	PAM01-fb (y5)	PAM01_a	PAM01_a(y5)_R
581332573	PAM01-fb (y5)	PAM01_a	PAM01_a(y5)_R
1109957857	PAM01-fb (y5)	PAM01_a	PAM01_a(y5)_R
488559952	PAM01-lc (y5)	PAM01_a	PAM01_a(y5)_R
1234481054	PAM01-lc (y5)	PAM01_a	PAM01_a(y5)_R
487899562	PAM01-lc (y5)	PAM01_a	PAM01_a(y5)_R
549955973	PAM01-lc (y5)	PAM01_a	PAM01_a(y5)_R
1233773217	PAM01-lc (y5)	PAM01_a	PAM01_a(y5)_R
1204124270	PAM01-lc (y5)	PAM01_a	PAM01_a(y5)_R
1266871604	PAM01-lc (y5)	PAM01_a	PAM01_a(y5)_R
1047525093	PAM01-lc (y5)	PAM01_a	PAM01_a(y5)_R
1203070528	PAM01-nc (y5)	PAM01_a	PAM01_a(y5)_R
1202397143	PAM01-nc (y5)	PAM01_b	PAM01_b(y5)_R
582355376	PAM01-nc (y5)	PAM08_e	PAM08_e(y4)_R
5812982779	PAM01-uc (y5)	PAM01_b	PAM01_b(y5)_R
925799233	PAM01-uc (y5)	PAM01_b	PAM01_b(y5)_R
1295855722	PAM01-uc (y5)	PAM01_b	PAM01_b(y5)_R
455159380	PAM01-uc (y5)	PAM01_b	PAM01_b(y5)_R
456174330	PAM01-uc (y5)	PAM01_b	PAM01_b(y5)_R
613398716	PAM01-uc (y5)	PAM01_b	PAM01_b(y5)_R
737167616	PAM02-ad (b'2a)	PAM02	PAM02(B'2a)_R
1295501882	PAM02-ad (b'2a)	PAM02	PAM02(B'2a)_R
1203066201	PAM02-ad (b'2a)	PAM02	PAM02(B'2a)_R
1110298200	PAM02-ad (b'2a)	PAM02	PAM02(B'2a)_R
1140655376	PAM02-pd (b'2a)	PAM02	PAM02(B'2a)_R
1172372655	PAM02-pd (b'2a)	PAM02	PAM02(B'2a)_R
1171690432	PAM02-pd (b'2a)	PAM02	PAM02(B'2a)_R
5813098776	PAM02-pd (b'2a)	PAM02	PAM02(B'2a)_R
1050585709	PAM03-can (b2b'2a)	PAM03	PAM03(B2B'2a)_R
5812989588	PAM03-can (b2b'2a)	PAM03	PAM03(B2B'2a)_R
1233436426	PAM03-can (b2b'2a)	PAM03	PAM03(B2B'2a)_R
1387583807	PAM03-can (b2b'2a)	PAM03	PAM03(B2B'2a)_R
422682603	PAM04-can (b2)	PAM04_a	PAM04_a(B2)_R
1047183897	PAM04-can (b2)	PAM04_a	PAM04_a(B2)_R
1419019956	PAM04-can (b2)	PAM04_a	PAM04_a(B2)_R
1203066401	PAM04-can (b2)	PAM04_a	PAM04_a(B2)_R
1141329053	PAM04-can (b2)	PAM04_a	PAM04_a(B2)_R
923726321	PAM04-can (b2)	PAM04_a	PAM04_a(B2)_R
1203066222	PAM04-can (b2)	PAM04_a	PAM04_a(B2)_R
612638791	PAM04-can (b2)	PAM04_a	PAM04_a(B2)_R
484735678	PAM04-can (b2)	PAM04_a	PAM04_a(B2)_R
800264315	PAM04-dd (b2)	PAM04_a	PAM04_a(B2)_R
1140996390	PAM04-dd (b2)	PAM04_a	PAM04_a(B2)_R
1141328881	PAM04-dd (b2)	PAM04_a	PAM04_a(B2)_R
453380528	PAM04-nc (b2)	PAM04_b	PAM04_b(B2)_R
1078572735	PAM04-nc (b2)	PAM04_a	PAM04_a(B2)_R
645090294	PAM04-nc (b2)	PAM04_a	PAM04_a(B2)_R
1418351262	PAM04-nc (b2)	PAM04_a	PAM04_a(B2)_R
1141337557	PAM05-dd (b'2p)	PAM08_d	PAM08_d(y4)_R
517207902	PAM05-dd (b'2p)	PAM05	PAM05(B'2p)_R
1171690479	PAM05-dd (b'2p)	PAM05	PAM05(B'2p)_R
1169993905	PAM05-dd (b'2p)	PAM05	PAM05(B'2p)_R
1169989698	PAM05-dd (b'2p)	PAM05	PAM05(B'2p)_R
549610772	PAM05-dd (b'2p)	PAM05	PAM05(B'2p)_R
5812982120	PAM05-vd (b'2p)	PAM05	PAM05(B'2p)_R
1170404875	PAM05-vd (b'2p)	PAM05	PAM05(B'2p)_R
1169989859	PAM05-vd (b'2p)	PAM05	PAM05(B'2p)_R
923385340	PAM05-vd (b'2p)	PAM05	PAM05(B'2p)_R
830276571	PAM05-vd (b'2p)	PAM05	PAM05(B'2p)_R
675763039	PAM06-can (b'2m)	PAM06_a	PAM06_a(B'2m)_R
5812979271	PAM06-can (b'2m)	PAM06_a	PAM06_a(B'2m)_R
1170322501	PAM06-can (b'2m)	PAM06_a	PAM06_a(B'2m)_R
1016839809	PAM06-can (b'2m)	PAM06_a	PAM06_a(B'2m)_R
5813127030	PAM06-can (b'2m)	PAM06_a	PAM06_a(B'2m)_R
5812982118	PAM06-can (b'2m)	PAM06_a	PAM06_a(B'2m)_R
765457262	PAM06-can (b'2m)	PAM06_a	PAM06_a(B'2m)_R
5813022201	PAM06-can (b'2m)	PAM06_a	PAM06_a(B'2m)_R
860983686	PAM06-can (b'2m)	PAM06_a	PAM06_a(B'2m)_R
5813063280	PAM06-can (b'2m)	PAM06_a	PAM06_a(B'2m)_R
1170413425	PAM06-can (b'2m)	PAM06_a	PAM06_a(B'2m)_R
834044577	PAM06-nc (b'2m)	PAM06_b	PAM06_b(B'2m)_R
1233436396	PAM06-nc (b'2m)	PAM06_b	PAM06_b(B'2m)_R
644417074	PAM06-nc (b'2m)	PAM06_b	PAM06_b(B'2m)_R
5812982091	PAM06-nc (b'2m)	PAM06_b	PAM06_b(B'2m)_R
1141687128	PAM07-can (y4<y1y2)	PAM07	PAM07(y4<y1y2)_R
1050249677	PAM07-can (y4<y1y2)	PAM07	PAM07(y4<y1y2)_R
1051630846	PAM07-can (y4<y1y2)	PAM08_e	PAM08_e(y4)_R
1204175835	PAM07-can (y4<y1y2)	PAM07	PAM07(y4<y1y2)_R
1142011140	PAM07-can (y4<y1y2)	PAM07	PAM07(y4<y1y2)_R
988852391	PAM07-can (y4<y1y2)	PAM08_a	PAM08_a(y4)_R
5813109941	PAM07-can (y4<y1y2)	PAM07	PAM07(y4<y1y2)_R
580317662	PAM08-lc (y4)	PAM08_c	PAM08_c(y4)_R
1110997994	PAM08-lc (y4)	PAM08_b	PAM08_b(y4)_R
1172031461	PAM08-lc (y4)	PAM08_c	PAM08_c(y4)_R
735134301	PAM08-lc (y4)	PAM08_c	PAM08_c(y4)_R
1141000881	PAM08-lc (y4)	PAM08_b	PAM08_b(y4)_R
924429714	PAM08-lc (y4)	PAM08_b	PAM08_b(y4)_R
1140655624	PAM08-lc (y4)	PAM08_c	PAM08_c(y4)_R
1173753977	PAM08-md (y4)	PAM08_e	PAM08_e(y4)_R
1141324564	PAM08-md (y4)	PAM08_e	PAM08_e(y4)_R
1173076392	PAM08-md (y4)	PAM08_e	PAM08_e(y4)_R
1141678948	PAM08-md (y4)	PAM08_e	PAM08_e(y4)_R
1141337605	PAM08-nc (y4)	PAM08_e	PAM08_e(y4)_R
1141350537	PAM08-nc (y4)	PAM08_b	PAM08_b(y4)_R
1110307501	PAM08-nc (y4)	PAM08_b	PAM08_b(y4)_R
1173076523	PAM08-nc (y4)	PAM08_e	PAM08_e(y4)_R
1326813363	PAM08-uc (y4)	PAM08_a	PAM08_a(y4)_R
1173745330	PAM08-uc (y4)	PAM08_a	PAM08_a(y4)_R
1141692008	PAM08-uc (y4)	PAM08_a	PAM08_a(y4)_R
1141342258	PAM08-uc (y4)	PAM08_a	PAM08_a(y4)_R
1142365351	PAM08-uc (y4)	PAM08_a	PAM08_a(y4)_R
1142356576	PAM08-uc (y4)	PAM08_a	PAM08_a(y4)_R
956138930	PAM08-uc (y4)	PAM08_a	PAM08_a(y4)_R
5813075824	PAM09-dd (b1ped)	PAM09	PAM09(B1ped)_R
299613480	PAM09-dd (b1ped)	PAM09	PAM09(B1ped)_R
1048207713	PAM09-vd (b1ped)	PAM09	PAM09(B1ped)_R
359586213	PAM09-vd (b1ped)	PAM09	PAM09(B1ped)_R
5812980567	PAM09-vd (b1ped)	PAM09	PAM09(B1ped)_R
360941147	PAM09-vd (b1ped)	PAM09	PAM09(B1ped)_R
455431209	PAM10-can (b1)	PAM10	PAM10(B1)_R
1110972158	PAM10-can (b1)	PAM10	PAM10(B1)_R
328546871	PAM10-can (b1)	PAM10	PAM10(B1)_R
298595394	PAM10-can (b1)	PAM10	PAM10(B1)_R
359598627	PAM10-can (b1)	PAM10	PAM10(B1)_R
328253133	PAM10-nc (b1)	PAM10	PAM10(B1)_R
1231299343	PAM11-aad (a1)	PAM11	PAM11(a1)_R
1077847238	PAM11-aad (a1)	PAM11	PAM11(a1)_R
482762280	PAM11-aad (a1)	PAM11	PAM11(a1)_R
5812983533	PAM11-dd (a1)	PAM11	PAM11(a1)_R
512765910	PAM11-dd (a1)	PAM11	PAM11(a1)_R
513451621	PAM11-dd (a1)	PAM11	PAM11(a1)_R
456846996	PAM11-nc (a1)	PAM11	PAM11(a1)_R
5813100896	PAM12-dd (y3)	PAM12	PAM12(y3)_R
862705904	PAM12-dd (y3)	PAM12	PAM12(y3)_R
829261936	PAM12-dd (y3)	PAM12	PAM12(y3)_R
983759126	PAM12-dd (y3)	PAM12	PAM12(y3)_R
5813087817	PAM12-dd (y3)	PAM12	PAM12(y3)_R
955464899	PAM12-dd (y3)	PAM12	PAM12(y3)_R
1141678665	PAM12-md (y3)	PAM12	PAM12(y3)_R
1205090786	PAM12-md (y3)	PAM12	PAM12(y3)_R
1206114100	PAM12-md (y3)	PAM12	PAM12(y3)_R
1173045815	PAM12-md (y3)	PAM12	PAM12(y3)_R
706819341	PAM13-dd (b'1ap)	PAM13	PAM13(B'1ap)_R
799578347	PAM13-dd (b'1ap)	PAM13	PAM13(B'1ap)_R
1141329227	PAM13-dd (b'1ap)	PAM13	PAM13(B'1ap)_R
800622401	PAM13-dd (b'1ap)	PAM13	PAM13(B'1ap)_R
1204391417	PAM13-vd (b'1ap)	PAM13	PAM13(B'1ap)_R
986828383	PAM13-vd (b'1ap)	PAM13	PAM13(B'1ap)_R
675468771	PAM13-vd (b'1ap)	PAM13	PAM13(B'1ap)_R
893710296	PAM14-can (b'1m)	PAM14	PAM14(B'1m)_R
675451588	PAM14-can (b'1m)	PAM14	PAM14(B'1m)_R
1173007139	PAM14-can (b'1m)	PAM14	PAM14(B'1m)_R
923027316	PAM14-can (b'1m)	PAM14	PAM14(B'1m)_R
735112319	PAM14-can (b'1m)	PAM14	PAM14(B'1m)_R
799919294	PAM14-can (b'1m)	PAM14	PAM14(B'1m)_R
766838498	PAM14-can (b'1m)	PAM14	PAM14(B'1m)_R
5813061879	PAM14-nc (b'1m)	PAM14	PAM14(B'1m)_R
5812979156	PAM15-lcan (y5b'2a)	PAM15_b	PAM15_b(y5B'2a)_R
1233436479	PAM15-lcan (y5b'2a)	PAM15_b	PAM15_b(y5B'2a)_R
5813096699	PAM15-ucan (y5b'2a)	PAM15_a	PAM15_a(y5B'2a)_R
393766777	PPL101 y1pedc	PPL101	PPL101(y1pedc)_R
1196854070	PPL101 y1pedc	PPL101	PPL101(y1pedc)(PDL05)_L
5812981381	PPL102 y1	PPL102	PPL102(y1)(PDL05)_L
5813058050	PPL102 y1	PPL102	PPL102(y1)_R
5813022424	PPL103 y2a'1	PPL103	PPL103(y2a'1)_R
1048172314	PPL103 y2a'1	PPL103	PPL103(y2a'1)(PDL05)_L
517514142	PPL104 a'3	PPL104	PPL104(a'3)_R
5813019976	PPL104 a'3	PPL104	PPL104(a'3)(PDL05)_L
5813019513	PPL105 a'2a2	PPL105	PPL105(a'2a2)_R
642516892	PPL105 a'2a2	PPL105	PPL105(a'2a2)(PDL05)_L
331662710	PPL106 a3	PPL106	PPL106(a3)_R
5813019607	PPL106 a3	PPL106	PPL106(a3)(PDL05)_L
