# Supplementary material for: The connectome of the adult Drosophila mushroom body provides insights into function
Source: eLife. 2020 Dec 14;9:e62576. doi: 10.7554/eLife.62576 (PMC7909955; doi:10.7554/eLife.62576)
Supplement: Supplementary file 2. [file elife-62576-supp2.xlsx]

## Sheet: Sheet 1 - Oxford_All Clusters
Supplemental File 1: DAN Clusters. Cluster numbers 1-35 are shown in Figure 31.
Cluster No.	NeuPrint BodyIDs of the neurons that make up each cluster
1	5813032847
2	424793122
3	519591210, 329978745, 613338546, 641645610, 700991872, 610611010, 486496648, 456156825, 5812980747, 765797569, 673733299, 360660371, 362020664
4	613420343
5	769263962
6	706862579, 5813022759, 613040803, 675136878
7	329646990, 607899687, 5813094811, 670297553, 5813020857, 5812980109, 826136822, 705787638, 766126400, 671660941, 736109737, 862697175
8	390275105, 389934175, 421305688, 453030534, 391310849, 420952125, 389575937, 419588136, 5813008938, 5813010210, 5813010255, 329566187, 390969969, 390258187, 359918228, 421318463, 328538398, 359897526, 330256546, 328201793
9	297917363, 297925608, 298616588, 5813019517, 5813026589, 328265389
10	359637824, 297178509, 297519807, 297166053, 328213227, 5812979942
11	5813020988
12	984794932, 1047887562, 894422413, 953855039, 1263037872, 831321033, 956820684
13	610731053, 581060581
14	329988112, 5812980147, 297934349, 298266903, 298944479, 297917364, 298241038
15	510269590, 509928946, 549935124, 580282938, 550617370
16	735470654
17	423416887
18	299626157, 361700223
19	544107335, 544107243, 730562988, 574040939, 5813022459, 483017681, 673426956
20	452336897, 425471220, 512765816, 5813021223, 392645419, 513404289, 5813012028, 543412198, 5901195496, 421957539, 5813067728, 517842578
21	266187559, 481731074, 484134987, 326888609
22	481679524
23	517242832
24	488581156
25	330998071, 362024428
26	673772290, 673435566, 673772244, 643073880, 643743142, 644083764
27	482071823
28	422755871, 609992451, 485171192, 454822714, 517911104
29	5812980884, 607251100, 388267095, 296203392, 296203434, 296203324, 481371769
30	675528661, 582101022, 550081666, 550422384
31	5813019588, 5813057169, 946645313, 329289084, 946308203, 5813061495, 5813055834, 452029745, 946641212
32	579235017, 607195856, 671307834, 642660081, 640617445, 737512824, 672002621, 799583417, 5812981240
33	953755666, 793728667, 794406234
34	612703762, 674100160, 643739027
35	667857582, 892376241, 861683024, 5813039962
36	787563949
37	913681721
38	1534721340
39	1224400894, 951018323, 764122498
40	1418618235
41	693927941
42	1316245799, 1671638278
43	1411784734, 1730656082
44	639276164
45	610274029, 1671952694, 577542489
46	5813079228
47	1670973150, 1759999022
48	1639243580, 1639234609
49	5813024799
50	1702306047, 1671608112
51	1794055377
52	1733677514, 1037293275
53	758296423
54	920873167, 920869856, 635890732, 766385551
55	819725372
56	947582284
57	5813022257
58	478591447
59	1049261193
60	575768294
61	549175510
62	736860990, 576825965
63	448342846, 5813022375
64	604195063
65	701672499
66	418607477, 1134140939, 821728921, 821729208, 790417660, 852763122
67	792062042
68	479908320
69	1282788953
70	644757911
71	674781866, 1011970102, 642720190, 922992588
72	5812980326
73	579194975
74	297925742
75	609677179, 518930220
76	1352077058
77	5813063587, 514850616
78	5813056041
79	330661529
80	361351171
81	800238269, 980982986
82	1104790425
83	5812982994, 1013636956, 1073314797
84	613394707, 579536041, 798939240
85	707854620, 707854989, 768590452, 5813098975, 1138212774
86	612336669
87	916456567, 888146447, 5813053805, 948851462, 1653139353
88	5812983831
89	676479217
90	919168397
91	767473384
92	1543949467
93	1134729441
94	420965117
95	580227374
96	5813021533
97	5813068707
98	487968933
99	484014387
100	388284324, 421946059
101	480258208
102	356809554
103	5813049920
104	698180927, 698185483
105	421646999
106	636102761
107	732600113
108	5813047371
109	515394155
110	5813056026
111	697476780
112	5901196932
113	543766436
114	605791875
115	577801333
116	515096130
117	542652400
118	482006328
119	605732731
120	455751103
121	541615964, 359581549
122	361968122
123	330604760, 5813055865
124	485715511, 513106377, 482757982, 543446584, 512416525
125	482417172, 5812980732, 390280026, 358890923, 485499217
126	581652283, 575426742, 583015749, 5813095395, 456187010, 482417237, 551989415
127	455828904, 5813047019, 451382570
128	575384259
129	295802733, 326474963, 298607679
130	5813056887
131	298262644
132	424443911
133	455820184
134	358613806, 390003153
135	6400000773, 487541595, 420696828
136	514068564
137	451049385
138	424379864
139	515450389
140	792364888
141	387180418
142	298931773
143	642948546
144	483025951
145	514073634
146	452698565, 422337400
147	453376390, 453026883
148	5813039922, 390947722
149	5813055904, 581013183, 578189576
150	362299997
151	516780722, 547158593, 582696254, 614081109
152	545444996
153	611361002
154	640596169
155	483720758
156	541347811, 604070433
157	5813049378, 575197482
158	452689494
159	485775679, 610916994, 5813115796, 329919036
160	488550675
161	487812620
162	357530358, 328214655
163	386842280, 356490891, 418214549
164	420252614
165	425060903, 326811922
166	5813056243
167	389929872, 390564245
168	329215304, 329582105, 359900300, 361964228, 391599963
169	5813019487
170	672960748
171	329574917
172	328546621, 267227062, 362007054
173	298254384
174	5813078542, 328870472
175	298936099
176	5813009312
177	299267723, 298935111
178	328887932
179	5813020785
180	5901221890
181	5813008934
182	267572587
183	267896359
184	297533212, 298214577
185	298603963
186	329257947, 328879764, 329254286
187	329897241
188	358899943
189	328861072
190	297519736
191	390599010
192	421654726, 390612328
193	360954739, 392325540, 451663172, 453355233, 452677002, 947820593, 329215996, 328197044, 359926923, 329552035, 393340402, 329206628, 359227113, 671268907, 5813010009, 484040200, 453717632, 359905678, 421975193, 391643292, 5813010191
194	327838570
195	545082184, 360254511, 421271305
196	391617921
197	328533761, 329897255, 360255138, 421641859, 391954490, 5813068669, 330268940, 328861282
198	361312808
199	329566197
200	328274638
201	359931311
202	297580589, 360591860, 298258611
203	423096943
204	328956505, 487899426, 360349882
205	297917474, 5813019630
206	328559607
207	5813049907
208	298258714, 422622063
209	297929768
210	327928411, 420347360
211	331011085
212	328213594
213	298586733, 299958695, 297230760, 298957344, 299954299, 299613271
214	5901203987
215	297563270
216	5813020817, 331338959
217	5813083733
218	5901195498
219	5812980079
220	5813092319, 267896360, 326888433, 266187383, 328269766, 5813047713, 263475451, 266528078, 296535868, 328593903, 266528086, 296194535, 5813064828, 266187477
221	296139882
222	297251714
223	297912117
224	297917475
225	488240010
226	519262429
227	388280529
228	828282250
229	326253554
230	451062462
231	451054039
232	327937506, 298262408
233	328611654
234	298262663
235	390352384
236	425148091, 393776005
237	298250090
238	421033734
239	299290105
240	297938585, 298275356
241	388975834
242	357599074
243	5813022160
244	5813020800, 328939480, 328244591, 549269622, 5813019560, 549158040, 549161688
245	360310976, 329970706, 330640044, 5813009595
246	417221397
247	451365099, 514475106
248	979368408
249	5813020735, 297183251
250	329566174
251	486842208, 915960293
252	612988814, 546765753, 637540087, 546765551, 642024743, 643717679
253	515813661, 548878145, 5901227537, 638930511, 425126008, 670651584
254	5813049380, 328611004
255	608628936
256	644450686
257	423748579, 487187476
258	613066879, 5813090556, 703059097, 705462899, 795135527, 734088804, 797194962, 827889434
259	641688553
260	612004584
261	919624822, 829279239
262	984449267, 862671913, 953410147, 952723817, 952724101, 922354084, 5813033196, 672006007, 768884949, 829593966, 5813094619, 796836697, 798908816, 736173896, 5813082459, 829598814, 830634936, 797187575, 800273538, 673362451
263	675784199, 361341837, 423749262
264	735798583, 423364866
265	5901197108, 517885151
266	5813021005
267	484126552, 510987433, 326817334, 486880919
268	516504076, 485132675, 5812980514, 487191620, 5813078504, 5813021600
269	610981555, 424089598, 516844782, 518861029
270	517514588
271	486812022, 579596940, 549219101, 578893446
272	612648076, 518183562
273	703387200, 516832391, 5813014526
274	5813055800, 387568523
275	487144598
276	579912201
277	609591758, 609591891, 609591823, 550280614, 609587511, 609591989, 609591880
278	518899665, 5813057216
279	640963092, 5813021728, 642693620, 768192947, 449205588, 449205611, 417834021
280	579234980, 576502536
281	548712377
282	393404592
283	361376643
284	298603730, 422738252
285	424434994
286	5813021235
287	669965108
288	549597974, 484130600
289	737491087, 672723441, 674420122, 704785256, 673405506, 580326857
290	5813021602
291	859265651
292	510049477
293	5813027592
294	639995972, 675767414
295	422751191
296	579575594
297	611629428
298	582381047
299	5813021046
300	701345660
301	5813123585
302	858906840
303	328601956
304	890614937, 699976619, 576519520, 607894716, 546507208, 704785058, 675809900, 675127915, 576898212, 423096449, 642509080, 483797945, 610981584, 579946370, 5813041169, 730687491, 760703506, 1015479949, 737486877
305	861583205
306	453087379
307	578254032
308	800212976, 1050922195, 1076173414
309	833043564
310	612712334, 612367371, 550638250
311	298258399
312	607597135
313	609656444
314	672407642
315	5813071068
316	456523994
317	5813083780
318	5813089157
319	457520516
320	486544396, 5813026705
321	423101189
322	550988122
323	421041565
324	455155337
325	361005850
326	5813056054, 486194398
327	298258513
328	5813009620
329	5813026661
330	5813057162, 361722354
331	298957166
332	5813055949
333	893723183, 985805061, 5813134055
334	517838849, 5901192948, 579230376
335	5901193671
336	736174181, 675822802
337	613044611
338	5813019850
339	5901213440
340	668967527
341	548570973
342	1049946735
343	859960201, 5901218930, 5813027737
344	892385258, 767904550, 582709537, 707509964, 582027783, 733458828
345	644433538
346	673758836
347	643401816
348	5813087891
349	611693656
350	701371011
351	488922181
352	1160073701
353	758674661, 669977676
354	5813020846
355	5901208687
356	390641835, 388924424, 392368893
357	485745069
358	609591686, 519249805, 609587618, 5813067769
359	480219247
360	5813019920, 579260627, 609247082, 735470305
361	705816818, 673426911, 671005363, 738531654, 800256481, 767878191, 482002172, 484735637, 674096140, 356429209, 540967864, 540972196, 675119034, 510278853, 702692200, 893338749, 5813058310, 355086967, 510278421, 731689147, 695500178, 642387793, 644761952, 675800901, 790982851, 822358700, 735772860, 706451920, 611323310, 643691163, 823015627, 612652688
362	453026933, 5901193642
363	706831482
364	702364805
365	5813032740
366	696432315
367	5813129453, 760268555, 5813014640, 448869118
368	542634516, 573329304, 573337611
369	604709727
370	511271574, 360284300
371	5813010279, 672429275, 487545695, 609660480, 643152220
372	486522269, 450026735, 611016455, 580667978
373	298266797, 298275090
374	550646730, 5813060687, 518934633, 548963433, 581013104, 581013253
375	519012059
376	704487840
377	550033958
378	361105354
379	786691714, 788400963
380	881506038
381	1131840673, 988567837, 1050935614, 890671753, 893741163
382	5812980666, 1225290633, 859618655
383	1449947867
384	669670654
385	952374245
386	508689623
387	1138587910
388	1202704262, 862787861
389	5813040190
390	582101205, 5812982125, 675187509, 643794320, 5813022199, 675187643, 644148647
391	5813070991
392	830034406
393	1170352367
394	1667886676
395	1299581176, 5813079192, 985826737
396	893754136
397	5901221584
398	5813068769, 800303089
399	1144761556
400	1013066710, 984536209
401	1232344382, 767541763, 831325065
402	760690116, 917919724

## Sheet: version 1
Supplemental File 1: DAN Clusters. Cluster numbers 1-35 are shown in Figure 31.
Cluster No.	NeuPrint BodyIDs of the neurons that make up each cluster
1	5813032847
2	424793122
3	519591210	329978745	613338546	641645610	700991872	610611010	486496648	456156825	5812980747	765797569	673733299	360660371	362020664
4	613420343
5	769263962
6	706862579	5813022759	613040803	675136878
7	329646990	607899687	5813094811	670297553	5813020857	5812980109	826136822	705787638	766126400	671660941	736109737	862697175
8	390275105	389934175	421305688	453030534	391310849	420952125	389575937	419588136	5813008938	5813010210	5813010255	329566187	390969969	390258187	359918228	421318463	328538398	359897526	330256546	328201793
9	297917363	297925608	298616588	5813019517	5813026589	328265389
10	359637824	297178509	297519807	297166053	328213227	5812979942
11	5813020988
12	984794932	1047887562	894422413	953855039	1263037872	831321033	956820684
13	610731053	581060581
14	329988112	5812980147	297934349	298266903	298944479	297917364	298241038
15	510269590	509928946	549935124	580282938	550617370
16	735470654
17	423416887
18	299626157	361700223
19	544107335	544107243	730562988	574040939	5813022459	483017681	673426956
20	452336897	425471220	512765816	5813021223	392645419	513404289	5813012028	543412198	5901195496	421957539	5813067728	517842578
21	266187559	481731074	484134987	326888609
22	481679524
23	517242832
24	488581156
25	330998071	362024428
26	673772290	673435566	673772244	643073880	643743142	644083764
27	482071823
28	422755871	609992451	485171192	454822714	517911104
29	5812980884	607251100	388267095	296203392	296203434	296203324	481371769
30	675528661	582101022	550081666	550422384
31	5813019588	5813057169	946645313	329289084	946308203	5813061495	5813055834	452029745	946641212
32	579235017	607195856	671307834	642660081	640617445	737512824	672002621	799583417	5812981240
33	953755666	793728667	794406234
34	612703762	674100160	643739027
35	667857582	892376241	861683024	5813039962
36	787563949
37	913681721
38	1534721340
39	1224400894	951018323	764122498
40	1418618235
41	693927941
42	1316245799	1671638278
43	1411784734	1730656082
44	639276164
45	610274029	1671952694	577542489
46	5813079228
47	1670973150	1759999022
48	1639243580	1639234609
49	5813024799
50	1702306047	1671608112
51	1794055377
52	1733677514	1037293275
53	758296423
54	920873167	920869856	635890732	766385551
55	819725372
56	947582284
57	5813022257
58	478591447
59	1049261193
60	575768294
61	549175510
62	736860990	576825965
63	448342846	5813022375
64	604195063
65	701672499
66	418607477	1134140939	821728921	821729208	790417660	852763122
67	792062042
68	479908320
69	1282788953
70	644757911
71	674781866	1011970102	642720190	922992588
72	5812980326
73	579194975
74	297925742
75	609677179	518930220
76	1352077058
77	5813063587	514850616
78	5813056041
79	330661529
80	361351171
81	800238269	980982986
82	1104790425
83	5812982994	1013636956	1073314797
84	613394707	579536041	798939240
85	707854620	707854989	768590452	5813098975	1138212774
86	612336669
87	916456567	888146447	5813053805	948851462	1653139353
88	5812983831
89	676479217
90	919168397
91	767473384
92	1543949467
93	1134729441
94	420965117
95	580227374
96	5813021533
97	5813068707
98	487968933
99	484014387
100	388284324	421946059
101	480258208
102	356809554
103	5813049920
104	698180927	698185483
105	421646999
106	636102761
107	732600113
108	5813047371
109	515394155
110	5813056026
111	697476780
112	5901196932
113	543766436
114	605791875
115	577801333
116	515096130
117	542652400
118	482006328
119	605732731
120	455751103
121	541615964	359581549
122	361968122
123	330604760	5813055865
124	485715511	513106377	482757982	543446584	512416525
125	482417172	5812980732	390280026	358890923	485499217
126	581652283	575426742	583015749	5813095395	456187010	482417237	551989415
127	455828904	5813047019	451382570
128	575384259
129	295802733	326474963	298607679
130	5813056887
131	298262644
132	424443911
133	455820184
134	358613806	390003153
135	6400000773	487541595	420696828
136	514068564
137	451049385
138	424379864
139	515450389
140	792364888
141	387180418
142	298931773
143	642948546
144	483025951
145	514073634
146	452698565	422337400
147	453376390	453026883
148	5813039922	390947722
149	5813055904	581013183	578189576
150	362299997
151	516780722	547158593	582696254	614081109
152	545444996
153	611361002
154	640596169
155	483720758
156	541347811	604070433
157	5813049378	575197482
158	452689494
159	485775679	610916994	5813115796	329919036
160	488550675
161	487812620
162	357530358	328214655
163	386842280	356490891	418214549
164	420252614
165	425060903	326811922
166	5813056243
167	389929872	390564245
168	329215304	329582105	359900300	361964228	391599963
169	5813019487
170	672960748
171	329574917
172	328546621	267227062	362007054
173	298254384
174	5813078542	328870472
175	298936099
176	5813009312
177	299267723	298935111
178	328887932
179	5813020785
180	5901221890
181	5813008934
182	267572587
183	267896359
184	297533212	298214577
185	298603963
186	329257947	328879764	329254286
187	329897241
188	358899943
189	328861072
190	297519736
191	390599010
192	421654726	390612328
193	360954739	392325540	451663172	453355233	452677002	947820593	329215996	328197044	359926923	329552035	393340402	329206628	359227113	671268907	5813010009	484040200	453717632	359905678	421975193	391643292	5813010191
194	327838570
195	545082184	360254511	421271305
196	391617921
197	328533761	329897255	360255138	421641859	391954490	5813068669	330268940	328861282
198	361312808
199	329566197
200	328274638
201	359931311
202	297580589	360591860	298258611
203	423096943
204	328956505	487899426	360349882
205	297917474	5813019630
206	328559607
207	5813049907
208	298258714	422622063
209	297929768
210	327928411	420347360
211	331011085
212	328213594
213	298586733	299958695	297230760	298957344	299954299	299613271
214	5901203987
215	297563270
216	5813020817	331338959
217	5813083733
218	5901195498
219	5812980079
220	5813092319	267896360	326888433	266187383	328269766	5813047713	263475451	266528078	296535868	328593903	266528086	296194535	5813064828	266187477
221	296139882
222	297251714
223	297912117
224	297917475
225	488240010
226	519262429
227	388280529
228	828282250
229	326253554
230	451062462
231	451054039
232	327937506	298262408
233	328611654
234	298262663
235	390352384
236	425148091	393776005
237	298250090
238	421033734
239	299290105
240	297938585	298275356
241	388975834
242	357599074
243	5813022160
244	5813020800	328939480	328244591	549269622	5813019560	549158040	549161688
245	360310976	329970706	330640044	5813009595
246	417221397
247	451365099	514475106
248	979368408
249	5813020735	297183251
250	329566174
251	486842208	915960293
252	612988814	546765753	637540087	546765551	642024743	643717679
253	515813661	548878145	5901227537	638930511	425126008	670651584
254	5813049380	328611004
255	608628936
256	644450686
257	423748579	487187476
258	613066879	5813090556	703059097	705462899	795135527	734088804	797194962	827889434
259	641688553
260	612004584
261	919624822	829279239
262	984449267	862671913	953410147	952723817	952724101	922354084	5813033196	672006007	768884949	829593966	5813094619	796836697	798908816	736173896	5813082459	829598814	830634936	797187575	800273538	673362451
263	675784199	361341837	423749262
264	735798583	423364866
265	5901197108	517885151
266	5813021005
267	484126552	510987433	326817334	486880919
268	516504076	485132675	5812980514	487191620	5813078504	5813021600
269	610981555	424089598	516844782	518861029
270	517514588
271	486812022	579596940	549219101	578893446
272	612648076	518183562
273	703387200	516832391	5813014526
274	5813055800	387568523
275	487144598
276	579912201
277	609591758	609591891	609591823	550280614	609587511	609591989	609591880
278	518899665	5813057216
279	640963092	5813021728	642693620	768192947	449205588	449205611	417834021
280	579234980	576502536
281	548712377
282	393404592
283	361376643
284	298603730	422738252
285	424434994
286	5813021235
287	669965108
288	549597974	484130600
289	737491087	672723441	674420122	704785256	673405506	580326857
290	5813021602
291	859265651
292	510049477
293	5813027592
294	639995972	675767414
295	422751191
296	579575594
297	611629428
298	582381047
299	5813021046
300	701345660
301	5813123585
302	858906840
303	328601956
304	890614937	699976619	576519520	607894716	546507208	704785058	675809900	675127915	576898212	423096449	642509080	483797945	610981584	579946370	5813041169	730687491	760703506	1015479949	737486877
305	861583205
306	453087379
307	578254032
308	800212976	1050922195	1076173414
309	833043564
310	612712334	612367371	550638250
311	298258399
312	607597135
313	609656444
314	672407642
315	5813071068
316	456523994
317	5813083780
318	5813089157
319	457520516
320	486544396	5813026705
321	423101189
322	550988122
323	421041565
324	455155337
325	361005850
326	5813056054	486194398
327	298258513
328	5813009620
329	5813026661
330	5813057162	361722354
331	298957166
332	5813055949
333	893723183	985805061	5813134055
334	517838849	5901192948	579230376
335	5901193671
336	736174181	675822802
337	613044611
338	5813019850
339	5901213440
340	668967527
341	548570973
342	1049946735
343	859960201	5901218930	5813027737
344	892385258	767904550	582709537	707509964	582027783	733458828
345	644433538
346	673758836
347	643401816
348	5813087891
349	611693656
350	701371011
351	488922181
352	1160073701
353	758674661	669977676
354	5813020846
355	5901208687
356	390641835	388924424	392368893
357	485745069
358	609591686	519249805	609587618	5813067769
359	480219247
360	5813019920	579260627	609247082	735470305
361	705816818	673426911	671005363	738531654	800256481	767878191	482002172	484735637	674096140	356429209	540967864	540972196	675119034	510278853	702692200	893338749	5813058310	355086967	510278421	731689147	695500178	642387793	644761952	675800901	790982851	822358700	735772860	706451920	611323310	643691163	823015627	612652688
362	453026933	5901193642
363	706831482
364	702364805
365	5813032740
366	696432315
367	5813129453	760268555	5813014640	448869118
368	542634516	573329304	573337611
369	604709727
370	511271574	360284300
371	5813010279	672429275	487545695	609660480	643152220
372	486522269	450026735	611016455	580667978
373	298266797	298275090
374	550646730	5813060687	518934633	548963433	581013104	581013253
375	519012059
376	704487840
377	550033958
378	361105354
379	786691714	788400963
380	881506038
381	1131840673	988567837	1050935614	890671753	893741163
382	5812980666	1225290633	859618655
383	1449947867
384	669670654
385	952374245
386	508689623
387	1138587910
388	1202704262	862787861
389	5813040190
390	582101205	5812982125	675187509	643794320	5813022199	675187643	644148647
391	5813070991
392	830034406
393	1170352367
394	1667886676
395	1299581176	5813079192	985826737
396	893754136
397	5901221584
398	5813068769	800303089
399	1144761556
400	1013066710	984536209
401	1232344382	767541763	831325065
402	760690116	917919724

## Sheet: version 2 
Supplemental File 1: DAN Clusters. Cluster numbers 1-35 are shown in Figure 31.
Cluster No.	NeuPrint BodyIDs of the neurons that make up each cluster
1	5813032847
2	424793122
3	519591210 329978745 613338546 641645610 700991872 610611010 486496648 456156825 5812980747 765797569 673733299 360660371 362020664
4	613420343
5	769263962
6	706862579 5813022759 613040803 675136878
7	329646990 607899687 5813094811 670297553 5813020857 5812980109 826136822 705787638 766126400 671660941 736109737 862697175
8	390275105 389934175 421305688 453030534 391310849 420952125 389575937 419588136 5813008938 5813010210 5813010255 329566187 390969969 390258187 359918228 421318463 328538398 359897526 330256546 328201793
9	297917363 297925608 298616588 5813019517 5813026589 328265389
10	359637824 297178509 297519807 297166053 328213227 5812979942
11	5813020988
12	984794932 1047887562 894422413 953855039 1263037872 831321033 956820684
13	610731053 581060581
14	329988112 5812980147 297934349 298266903 298944479 297917364 298241038
15	510269590 509928946 549935124 580282938 550617370
16	735470654
17	423416887
18	299626157 361700223
19	544107335 544107243 730562988 574040939 5813022459 483017681 673426956
20	452336897 425471220 512765816 5813021223 392645419 513404289 5813012028 543412198 5901195496 421957539 5813067728 517842578
21	266187559 481731074 484134987 326888609
22	481679524
23	517242832
24	488581156
25	330998071 362024428
26	673772290 673435566 673772244 643073880 643743142 644083764
27	482071823
28	422755871 609992451 485171192 454822714 517911104
29	5812980884 607251100 388267095 296203392 296203434 296203324 481371769
30	675528661 582101022 550081666 550422384
31	5813019588 5813057169 946645313 329289084 946308203 5813061495 5813055834 452029745 946641212
32	579235017 607195856 671307834 642660081 640617445 737512824 672002621 799583417 5812981240
33	953755666 793728667 794406234
34	612703762 674100160 643739027
35	667857582 892376241 861683024 5813039962
36	787563949
37	913681721
38	1534721340
39	1224400894 951018323 764122498
40	1418618235
41	693927941
42	1316245799 1671638278
43	1411784734 1730656082
44	639276164
45	610274029 1671952694 577542489
46	5813079228
47	1670973150 1759999022
48	1639243580 1639234609
49	5813024799
50	1702306047 1671608112
51	1794055377
52	1733677514 1037293275
53	758296423
54	920873167 920869856 635890732 766385551
55	819725372
56	947582284
57	5813022257
58	478591447
59	1049261193
60	575768294
61	549175510
62	736860990 576825965
63	448342846 5813022375
64	604195063
65	701672499
66	418607477 1134140939 821728921 821729208 790417660 852763122
67	792062042
68	479908320
69	1282788953
70	644757911
71	674781866 1011970102 642720190 922992588
72	5812980326
73	579194975
74	297925742
75	609677179 518930220
76	1352077058
77	5813063587 514850616
78	5813056041
79	330661529
80	361351171
81	800238269 980982986
82	1104790425
83	5812982994 1013636956 1073314797
84	613394707 579536041 798939240
85	707854620 707854989 768590452 5813098975 1138212774
86	612336669
87	916456567 888146447 5813053805 948851462 1653139353
88	5812983831
89	676479217
90	919168397
91	767473384
92	1543949467
93	1134729441
94	420965117
95	580227374
96	5813021533
97	5813068707
98	487968933
99	484014387
100	388284324 421946059
101	480258208
102	356809554
103	5813049920
104	698180927 698185483
105	421646999
106	636102761
107	732600113
108	5813047371
109	515394155
110	5813056026
111	697476780
112	5901196932
113	543766436
114	605791875
115	577801333
116	515096130
117	542652400
118	482006328
119	605732731
120	455751103
121	541615964 359581549
122	361968122
123	330604760 5813055865
124	485715511 513106377 482757982 543446584 512416525
125	482417172 5812980732 390280026 358890923 485499217
126	581652283 575426742 583015749 5813095395 456187010 482417237 551989415
127	455828904 5813047019 451382570
128	575384259
129	295802733 326474963 298607679
130	5813056887
131	298262644
132	424443911
133	455820184
134	358613806 390003153
135	6400000773 487541595 420696828
136	514068564
137	451049385
138	424379864
139	515450389
140	792364888
141	387180418
142	298931773
143	642948546
144	483025951
145	514073634
146	452698565 422337400
147	453376390 453026883
148	5813039922 390947722
149	5813055904 581013183 578189576
150	362299997
151	516780722 547158593 582696254 614081109
152	545444996
153	611361002
154	640596169
155	483720758
156	541347811 604070433
157	5813049378 575197482
158	452689494
159	485775679 610916994 5813115796 329919036
160	488550675
161	487812620
162	357530358 328214655
163	386842280 356490891 418214549
164	420252614
165	425060903 326811922
166	5813056243
167	389929872 390564245
168	329215304 329582105 359900300 361964228 391599963
169	5813019487
170	672960748
171	329574917
172	328546621 267227062 362007054
173	298254384
174	5813078542 328870472
175	298936099
176	5813009312
177	299267723 298935111
178	328887932
179	5813020785
180	5901221890
181	5813008934
182	267572587
183	267896359
184	297533212 298214577
185	298603963
186	329257947 328879764 329254286
187	329897241
188	358899943
189	328861072
190	297519736
191	390599010
192	421654726 390612328
193	360954739 392325540 451663172 453355233 452677002 947820593 329215996 328197044 359926923 329552035 393340402 329206628 359227113 671268907 5813010009 484040200 453717632 359905678 421975193 391643292 5813010191
194	327838570
195	545082184 360254511 421271305
196	391617921
197	328533761 329897255 360255138 421641859 391954490 5813068669 330268940 328861282
198	361312808
199	329566197
200	328274638
201	359931311
202	297580589 360591860 298258611
203	423096943
204	328956505 487899426 360349882
205	297917474 5813019630
206	328559607
207	5813049907
208	298258714 422622063
209	297929768
210	327928411 420347360
211	331011085
212	328213594
213	298586733 299958695 297230760 298957344 299954299 299613271
214	5901203987
215	297563270
216	5813020817 331338959
217	5813083733
218	5901195498
219	5812980079
220	5813092319 267896360 326888433 266187383 328269766 5813047713 263475451 266528078 296535868 328593903 266528086 296194535 5813064828 266187477
221	296139882
222	297251714
223	297912117
224	297917475
225	488240010
226	519262429
227	388280529
228	828282250
229	326253554
230	451062462
231	451054039
232	327937506 298262408
233	328611654
234	298262663
235	390352384
236	425148091 393776005
237	298250090
238	421033734
239	299290105
240	297938585 298275356
241	388975834
242	357599074
243	5813022160
244	5813020800 328939480 328244591 549269622 5813019560 549158040 549161688
245	360310976 329970706 330640044 5813009595
246	417221397
247	451365099 514475106
248	979368408
249	5813020735 297183251
250	329566174
251	486842208 915960293
252	612988814 546765753 637540087 546765551 642024743 643717679
253	515813661 548878145 5901227537 638930511 425126008 670651584
254	5813049380 328611004
255	608628936
256	644450686
257	423748579 487187476
258	613066879 5813090556 703059097 705462899 795135527 734088804 797194962 827889434
259	641688553
260	612004584
261	919624822 829279239
262	984449267 862671913 953410147 952723817 952724101 922354084 5813033196 672006007 768884949 829593966 5813094619 796836697 798908816 736173896 5813082459 829598814 830634936 797187575 800273538 673362451
263	675784199 361341837 423749262
264	735798583 423364866
265	5901197108 517885151
266	5813021005
267	484126552 510987433 326817334 486880919
268	516504076 485132675 5812980514 487191620 5813078504 5813021600
269	610981555 424089598 516844782 518861029
270	517514588
271	486812022 579596940 549219101 578893446
272	612648076 518183562
273	703387200 516832391 5813014526
274	5813055800 387568523
275	487144598
276	579912201
277	609591758 609591891 609591823 550280614 609587511 609591989 609591880
278	518899665 5813057216
279	640963092 5813021728 642693620 768192947 449205588 449205611 417834021
280	579234980 576502536
281	548712377
282	393404592
283	361376643
284	298603730 422738252
285	424434994
286	5813021235
287	669965108
288	549597974 484130600
289	737491087 672723441 674420122 704785256 673405506 580326857
290	5813021602
291	859265651
292	510049477
293	5813027592
294	639995972 675767414
295	422751191
296	579575594
297	611629428
298	582381047
299	5813021046
300	701345660
301	5813123585
302	858906840
303	328601956
304	890614937 699976619 576519520 607894716 546507208 704785058 675809900 675127915 576898212 423096449 642509080 483797945 610981584 579946370 5813041169 730687491 760703506 1015479949 737486877
305	861583205
306	453087379
307	578254032
308	800212976 1050922195 1076173414
309	833043564
310	612712334 612367371 550638250
311	298258399
312	607597135
313	609656444
314	672407642
315	5813071068
316	456523994
317	5813083780
318	5813089157
319	457520516
320	486544396 5813026705
321	423101189
322	550988122
323	421041565
324	455155337
325	361005850
326	5813056054 486194398
327	298258513
328	5813009620
329	5813026661
330	5813057162 361722354
331	298957166
332	5813055949
333	893723183 985805061 5813134055
334	517838849 5901192948 579230376
335	5901193671
336	736174181 675822802
337	613044611
338	5813019850
339	5901213440
340	668967527
341	548570973
342	1049946735
343	859960201 5901218930 5813027737
344	892385258 767904550 582709537 707509964 582027783 733458828
345	644433538
346	673758836
347	643401816
348	5813087891
349	611693656
350	701371011
351	488922181
352	1160073701
353	758674661 669977676
354	5813020846
355	5901208687
356	390641835 388924424 392368893
357	485745069
358	609591686 519249805 609587618 5813067769
359	480219247
360	5813019920 579260627 609247082 735470305
361	705816818 673426911 671005363 738531654 800256481 767878191 482002172 484735637 674096140 356429209 540967864 540972196 675119034 510278853 702692200 893338749 5813058310 355086967 510278421 731689147 695500178 642387793 644761952 675800901 790982851 822358700 735772860 706451920 611323310 643691163 823015627 612652688
362	453026933 5901193642
363	706831482
364	702364805
365	5813032740
366	696432315
367	5813129453 760268555 5813014640 448869118
368	542634516 573329304 573337611
369	604709727
370	511271574 360284300
371	5813010279 672429275 487545695 609660480 643152220
372	486522269 450026735 611016455 580667978
373	298266797 298275090
374	550646730 5813060687 518934633 548963433 581013104 581013253
375	519012059
376	704487840
377	550033958
378	361105354
379	786691714 788400963
380	881506038
381	1131840673 988567837 1050935614 890671753 893741163
382	5812980666 1225290633 859618655
383	1449947867
384	669670654
385	952374245
386	508689623
387	1138587910
388	1202704262 862787861
389	5813040190
390	582101205 5812982125 675187509 643794320 5813022199 675187643 644148647
391	5813070991
392	830034406
393	1170352367
394	1667886676
395	1299581176 5813079192 985826737
396	893754136
397	5901221584
398	5813068769 800303089
399	1144761556
400	1013066710 984536209
401	1232344382 767541763 831325065
402	760690116 917919724

## Sheet: version 3
Supplemental File 1: DAN Clusters. Cluster numbers 1-35 are shown in Figure 31.
Cluster No.	NeuPrint BodyIDs of the neurons that make up each cluster
1	5813032847
2	424793122
3	519591210 329978745 613338546 641645610 700991872 610611010 486496648 456156825 5812980747 765797569 673733299 360660371 362020664
4	613420343
5	769263962
6	706862579 5813022759 613040803 675136878
7	329646990 607899687 5813094811 670297553 5813020857 5812980109 826136822 705787638 766126400 671660941 736109737 862697175
8	390275105 389934175 421305688 453030534 391310849 420952125 389575937 419588136 5813008938 5813010210 5813010255 329566187 390969969 390258187 359918228 421318463 328538398 359897526 330256546 328201793
9	297917363 297925608 298616588 5813019517 5813026589 328265389
10	359637824 297178509 297519807 297166053 328213227 5812979942
11	5813020988
12	984794932 1047887562 894422413 953855039 1263037872 831321033 956820684
13	610731053 581060581
14	329988112 5812980147 297934349 298266903 298944479 297917364 298241038
15	510269590 509928946 549935124 580282938 550617370
16	735470654
17	423416887
18	299626157 361700223
19	544107335 544107243 730562988 574040939 5813022459 483017681 673426956
20	452336897 425471220 512765816 5813021223 392645419 513404289 5813012028 543412198 5901195496 421957539 5813067728 517842578
21	266187559 481731074 484134987 326888609
22	481679524
23	517242832
24	488581156
25	330998071 362024428
26	673772290 673435566 673772244 643073880 643743142 644083764
27	482071823
28	422755871 609992451 485171192 454822714 517911104
29	5812980884 607251100 388267095 296203392 296203434 296203324 481371769
30	675528661 582101022 550081666 550422384
31	5813019588 5813057169 946645313 329289084 946308203 5813061495 5813055834 452029745 946641212
32	579235017 607195856 671307834 642660081 640617445 737512824 672002621 799583417 5812981240
33	953755666 793728667 794406234
34	612703762 674100160 643739027
35	667857582 892376241 861683024 5813039962
36	787563949
37	913681721
38	1534721340
39	1224400894 951018323 764122498
40	1418618235
41	693927941
42	1316245799 1671638278
43	1411784734 1730656082
44	639276164
45	610274029 1671952694 577542489
46	5813079228
47	1670973150 1759999022
48	1639243580 1639234609
49	5813024799
50	1702306047 1671608112
51	1794055377
52	1733677514 1037293275
53	758296423
54	920873167 920869856 635890732 766385551
55	819725372
56	947582284
57	5813022257
58	478591447
59	1049261193
60	575768294
61	549175510
62	736860990 576825965
63	448342846 5813022375
64	604195063
65	701672499
66	418607477 1134140939 821728921 821729208 790417660 852763122
67	792062042
68	479908320
69	1282788953
70	644757911
71	674781866 1011970102 642720190 922992588
72	5812980326
73	579194975
74	297925742
75	609677179 518930220
76	1352077058
77	5813063587 514850616
78	5813056041
79	330661529
80	361351171
81	800238269 980982986
82	1104790425
83	5812982994 1013636956 1073314797
84	613394707 579536041 798939240
85	707854620 707854989 768590452 5813098975 1138212774
86	612336669
87	916456567 888146447 5813053805 948851462 1653139353
88	5812983831
89	676479217
90	919168397
91	767473384
92	1543949467
93	1134729441
94	420965117
95	580227374
96	5813021533
97	5813068707
98	487968933
99	484014387
100	388284324 421946059
101	480258208
102	356809554
103	5813049920
104	698180927 698185483
105	421646999
106	636102761
107	732600113
108	5813047371
109	515394155
110	5813056026
111	697476780
112	5901196932
113	543766436
114	605791875
115	577801333
116	515096130
117	542652400
118	482006328
119	605732731
120	455751103
121	541615964 359581549
122	361968122
123	330604760 5813055865
124	485715511 513106377 482757982 543446584 512416525
125	482417172 5812980732 390280026 358890923 485499217
126	581652283 575426742 583015749 5813095395 456187010 482417237 551989415
127	455828904 5813047019 451382570
128	575384259
129	295802733 326474963 298607679
130	5813056887
131	298262644
132	424443911
133	455820184
134	358613806 390003153
135	6400000773 487541595 420696828
136	514068564
137	451049385
138	424379864
139	515450389
140	792364888
141	387180418
142	298931773
143	642948546
144	483025951
145	514073634
146	452698565 422337400
147	453376390 453026883
148	5813039922 390947722
149	5813055904 581013183 578189576
150	362299997
151	516780722 547158593 582696254 614081109
152	545444996
153	611361002
154	640596169
155	483720758
156	541347811 604070433
157	5813049378 575197482
158	452689494
159	485775679 610916994 5813115796 329919036
160	488550675
161	487812620
162	357530358 328214655
163	386842280 356490891 418214549
164	420252614
165	425060903 326811922
166	5813056243
167	389929872 390564245
168	329215304 329582105 359900300 361964228 391599963
169	5813019487
170	672960748
171	329574917
172	328546621 267227062 362007054
173	298254384
174	5813078542 328870472
175	298936099
176	5813009312
177	299267723 298935111
178	328887932
179	5813020785
180	5901221890
181	5813008934
182	267572587
183	267896359
184	297533212 298214577
185	298603963
186	329257947 328879764 329254286
187	329897241
188	358899943
189	328861072
190	297519736
191	390599010
192	421654726 390612328
193	360954739 392325540 451663172 453355233 452677002 947820593 329215996 328197044 359926923 329552035 393340402 329206628 359227113 671268907 5813010009 484040200 453717632 359905678 421975193 391643292 5813010191
194	327838570
195	545082184 360254511 421271305
196	391617921
197	328533761 329897255 360255138 421641859 391954490 5813068669 330268940 328861282
198	361312808
199	329566197
200	328274638
201	359931311
202	297580589 360591860 298258611
203	423096943
204	328956505 487899426 360349882
205	297917474 5813019630
206	328559607
207	5813049907
208	298258714 422622063
209	297929768
210	327928411 420347360
211	331011085
212	328213594
213	298586733 299958695 297230760 298957344 299954299 299613271
214	5901203987
215	297563270
216	5813020817 331338959
217	5813083733
218	5901195498
219	5812980079
220	5813092319 267896360 326888433 266187383 328269766 5813047713 263475451 266528078 296535868 328593903 266528086 296194535 5813064828 266187477
221	296139882
222	297251714
223	297912117
224	297917475
225	488240010
226	519262429
227	388280529
228	828282250
229	326253554
230	451062462
231	451054039
232	327937506 298262408
233	328611654
234	298262663
235	390352384
236	425148091 393776005
237	298250090
238	421033734
239	299290105
240	297938585 298275356
241	388975834
242	357599074
243	5813022160
244	5813020800 328939480 328244591 549269622 5813019560 549158040 549161688
245	360310976 329970706 330640044 5813009595
246	417221397
247	451365099 514475106
248	979368408
249	5813020735 297183251
250	329566174
251	486842208 915960293
252	612988814 546765753 637540087 546765551 642024743 643717679
253	515813661 548878145 5901227537 638930511 425126008 670651584
254	5813049380 328611004
255	608628936
256	644450686
257	423748579 487187476
258	613066879 5813090556 703059097 705462899 795135527 734088804 797194962 827889434
259	641688553
260	612004584
261	919624822 829279239
262	984449267 862671913 953410147 952723817 952724101 922354084 5813033196 672006007 768884949 829593966 5813094619 796836697 798908816 736173896 5813082459 829598814 830634936 797187575 800273538 673362451
263	675784199 361341837 423749262
264	735798583 423364866
265	5901197108 517885151
266	5813021005
267	484126552 510987433 326817334 486880919
268	516504076 485132675 5812980514 487191620 5813078504 5813021600
269	610981555 424089598 516844782 518861029
270	517514588
271	486812022 579596940 549219101 578893446
272	612648076 518183562
273	703387200 516832391 5813014526
274	5813055800 387568523
275	487144598
276	579912201
277	609591758 609591891 609591823 550280614 609587511 609591989 609591880
278	518899665 5813057216
279	640963092 5813021728 642693620 768192947 449205588 449205611 417834021
280	579234980 576502536
281	548712377
282	393404592
283	361376643
284	298603730 422738252
285	424434994
286	5813021235
287	669965108
288	549597974 484130600
289	737491087 672723441 674420122 704785256 673405506 580326857
290	5813021602
291	859265651
292	510049477
293	5813027592
294	639995972 675767414
295	422751191
296	579575594
297	611629428
298	582381047
299	5813021046
300	701345660
301	5813123585
302	858906840
303	328601956
304	890614937 699976619 576519520 607894716 546507208 704785058 675809900 675127915 576898212 423096449 642509080 483797945 610981584 579946370 5813041169 730687491 760703506 1015479949 737486877
305	861583205
306	453087379
307	578254032
308	800212976 1050922195 1076173414
309	833043564
310	612712334 612367371 550638250
311	298258399
312	607597135
313	609656444
314	672407642
315	5813071068
316	456523994
317	5813083780
318	5813089157
319	457520516
320	486544396 5813026705
321	423101189
322	550988122
323	421041565
324	455155337
325	361005850
326	5813056054 486194398
327	298258513
328	5813009620
329	5813026661
330	5813057162 361722354
331	298957166
332	5813055949
333	893723183 985805061 5813134055
334	517838849 5901192948 579230376
335	5901193671
336	736174181 675822802
337	613044611
338	5813019850
339	5901213440
340	668967527
341	548570973
342	1049946735
343	859960201 5901218930 5813027737
344	892385258 767904550 582709537 707509964 582027783 733458828
345	644433538
346	673758836
347	643401816
348	5813087891
349	611693656
350	701371011
351	488922181
352	1160073701
353	758674661 669977676
354	5813020846
355	5901208687
356	390641835 388924424 392368893
357	485745069
358	609591686 519249805 609587618 5813067769
359	480219247
360	5813019920 579260627 609247082 735470305
361	705816818 673426911 671005363 738531654 800256481 767878191 482002172 484735637 674096140 356429209 540967864 540972196 675119034 510278853 702692200 893338749 5813058310 355086967 510278421 731689147 695500178 642387793 644761952 675800901 790982851 822358700 735772860 706451920 611323310 643691163 823015627 612652688
362	453026933 5901193642
363	706831482
364	702364805
365	5813032740
366	696432315
367	5813129453 760268555 5813014640 448869118
368	542634516 573329304 573337611
369	604709727
370	511271574 360284300
371	5813010279 672429275 487545695 609660480 643152220
372	486522269 450026735 611016455 580667978
373	298266797 298275090
374	550646730 5813060687 518934633 548963433 581013104 581013253
375	519012059
376	704487840
377	550033958
378	361105354
379	786691714 788400963
380	881506038
381	1131840673 988567837 1050935614 890671753 893741163
382	5812980666 1225290633 859618655
383	1449947867
384	669670654
385	952374245
386	508689623
387	1138587910
388	1202704262 862787861
389	5813040190
390	582101205 5812982125 675187509 643794320 5813022199 675187643 644148647
391	5813070991
392	830034406
393	1170352367
394	1667886676
395	1299581176 5813079192 985826737
396	893754136
397	5901221584
398	5813068769 800303089
399	1144761556
400	1013066710 984536209
401	1232344382 767541763 831325065
402	760690116 917919724
